# Supplementary material for: Potentiation of the bioavailability of blueberry phenolic compounds by co-ingested grape phenolic compounds in mice, revealed by targeted metabolomic profiling in plasma and feces
Source: Royal Society of Chemistry journal article supplement (doi:10.1039/c6fo00902f), 2016-01-01
Supplement: c6fo00902f1.pdf [file c6fo00902f1.pdf]

## Potential of the bioavailability of blueberry phenolic compounds by co-ingested grape phenolic compounds in mice, revealed by targeted metabolomic profiling in plasma and feces

### Food & Function

Stéphanie Dudonné\*, Alexandre Dal-Pan, Pascal Dubé, Thibault V. Varin, Frédéric Calon, Yves Desjardins

\*Corresponding author: Institute of Nutrition and Functional Foods (INAF), Laval University, 2440 boulevard Hochelaga, Québec (QC) G1V0A6, Canada. E-mail: [stephanie.dudonne.1@ulaval.ca](mailto:stephanie.dudonne.1@ulaval.ca)

**Table S1: Concentrations of phenolic metabolites identified in plasma of mice following acute administration of fruit extracts (D0t30).**

| Metabolite                      | Plasma concentration (nM) |            |               |                 |
|---------------------------------|---------------------------|------------|---------------|-----------------|
|                                 | Control                   | Blueberry  | Grape         | Blueberry-grape |
| (+)-Catechin                    | ND                        | ND         | 705 ± 183     | 444 ± 79        |
| (-)-Epicatechin                 | ND                        | ND         | 1481 ± 249    | 1105 ± 186      |
| Catechins glucuronide           | ND                        | ND         | 96860 ± 10060 | 92348 ± 14664   |
| Catechins sulfate               | ND                        | ND         | 10076 ± 3893  | 21159 ± 6503    |
| Catechins glucuronide sulfate   | ND                        | ND         | 3157 ± 642    | 3293 ± 1454     |
| Methyl catechins glucuronide    | ND                        | ND         | 29188 ± 3665  | 27938 ± 2447    |
| Methyl catechins sulfate        | ND                        | ND         | 4762 ± 957    | 4854 ± 1101     |
| B-type procyanidins dimers      | ND                        | ND         | 1298 ± 382    | 1298 ± 271      |
| Dihydroxyphenyl-γ-valerolactone | ND                        | ND         | 67 ± 44       | 174 ± 85        |
| Resveratrol glucuronide         | ND                        | ND         | 45 ± 9        | 87 ± 18         |
| Quercetin glucuronide           | ND                        | 6 ± 2      | ND            | 12 ± 3          |
| Petunidin 3-glucoside           | ND                        | 1 ± 0.3    | ND            | 3 ± 0.4         |
| Malvidin 3-glucoside            | ND                        | 5 ± 1      | ND            | 11 ± 1          |
| Chlorogenic acid                | ND                        | 320 ± 120  | ND            | 874 ± 180       |
| Dihydroxycinnamic acid          | ND                        | 3312 ± 735 | 47 ± 10       | 2541 ± 627      |
| Ferulic acid                    | 2 ± 2                     | 62 ± 12    | 16 ± 2        | 45 ± 6          |
| Gallic acid                     | ND                        | 211 ± 110  | 8854 ± 1120   | 9324 ± 1581     |
| Protocatechuic acid             | ND                        | 535 ± 93   | 104 ± 21      | 484 ± 103       |
| Vanillic acid                   | 44 ± 19                   | 198 ± 33   | 98 ± 25       | 256 ± 49        |
| Total (μM)                      | < 0.05                    | 5 ± 1      | 157 ± 12      | 166 ± 25        |

Data are expressed as mean of replicates ± SEM (control group: n=6 mice, treated groups: n=10).  
ND: Not detected

**Table S2: Concentrations of phenolic metabolites identified in plasma of mice following chronic administration of fruit extracts (D15t30).**

| Metabolite                      | Plasma concentration (nM) |             |               |                 |
|---------------------------------|---------------------------|-------------|---------------|-----------------|
|                                 | Control                   | Blueberry   | Grape         | Blueberry-grape |
| (+)-Catechin                    | ND                        | ND          | 968 ± 357     | 821 ± 227       |
| (-)-Epicatechin                 | ND                        | ND          | 2705 ± 550    | 3701 ± 1058     |
| Catechins glucuronide           | ND                        | ND          | 97650 ± 18129 | 169357 ± 33929  |
| Catechins sulfate               | ND                        | ND          | 27922 ± 8728  | 54063 ± 21491   |
| Catechins glucuronide sulfate   | ND                        | ND          | 5648 ± 1490   | 11236 ± 3750    |
| Methyl catechins glucuronide    | ND                        | ND          | 44098 ± 5578  | 72475 ± 9901    |
| Methyl catechins sulfate        | ND                        | ND          | 9697 ± 2661   | 13432 ± 4035    |
| B-type procyanidins dimers      | ND                        | ND          | 2258 ± 1028   | 2384 ± 797      |
| Dihydroxyphenyl-γ-valerolactone | ND                        | ND          | 1080 ± 471    | 1369 ± 856      |
| Resveratrol glucuronide         | ND                        | ND          | 45 ± 17       | 120 ± 45        |
| Quercetin glucuronide           | ND                        | 10 ± 5      | ND            | 30 ± 7          |
| Petunidin 3-glucoside           | ND                        | 2 ± 0.3     | ND            | 8 ± 2           |
| Malvidin 3-glucoside            | ND                        | 8 ± 2       | ND            | 36 ± 11         |
| Chlorogenic acid                | ND                        | 362 ± 87    | ND            | 1962 ± 784      |
| Dihydroxycinnamic acid          | 81 ± 56                   | 4765 ± 1545 | 185 ± 94      | 6035 ± 1574     |
| Ferulic acid                    | 25 ± 15                   | 162 ± 58    | 50 ± 17       | 151 ± 31        |
| Gallic acid                     | ND                        | 189 ± 32    | 5914 ± 1372   | 10835 ± 2464    |
| Protocatechuic acid             | ND                        | 591 ± 168   | 111 ± 30      | 965 ± 300       |
| Vanillic acid                   | 22 ± 9                    | 273 ± 93    | 164 ± 40      | 526 ± 146       |
| Total (µM)                      | < 0.2                     | 6 ± 2       | 198 ± 34      | 350 ± 72        |

Data are expressed as mean of replicates ± SEM (control group: n=6 mice, treated groups: n=10).  
 ND: Not detected

**Table S3: Concentrations of phenolic metabolites identified in feces of mice following chronic administration of fruit extracts (D1-D15).**

| Metabolite                           | Concentration in feces (pmol/g) |              |                |                 |
|--------------------------------------|---------------------------------|--------------|----------------|-----------------|
|                                      | Control                         | Blueberry    | Grape          | Blueberry-grape |
| (+)-Catechin                         | ND                              | ND           | 10183 ± 1752   | 10610 ± 2181    |
| (-)-Epicatechin                      | ND                              | ND           | 14201 ± 2135   | 16243 ± 4161    |
| Catechins glucuronide                | ND                              | ND           | 8474 ± 2027    | 6157 ± 1221     |
| Catechins sulfate                    | ND                              | ND           | 303123 ± 46085 | 171137 ± 54465  |
| Catechins glucuronide sulfate        | ND                              | ND           | 1042 ± 261     | 793 ± 233       |
| Methyl catechins glucuronide         | ND                              | ND           | 3414 ± 543     | 2494 ± 517      |
| Methyl catechins sulfate             | ND                              | 2071 ± 441   | 130663 ± 17587 | 104483 ± 24347  |
| Methyl catechins glucuronide sulfate | ND                              | ND           | 255 ± 26       | 278 ± 53        |
| B-type procyanidins dimers           | ND                              | 87 ± 19      | 82565 ± 7946   | 75577 ± 12131   |
| B-type procyanidins trimers          | ND                              | ND           | 2463 ± 262     | 2488 ± 346      |
| Hydroxyphenyl-γ-valerolactone        | ND                              | ND           | 61884 ± 7800   | 47647 ± 9683    |
| Dihydroxyphenyl-γ-valerolactone      | ND                              | 6318 ± 1412  | 145113 ± 7863  | 105825 ± 17806  |
| Resveratrol                          | ND                              | ND           | 9 ± 3          | 7 ± 2           |
| Resveratrol sulfate                  | ND                              | ND           | 663 ± 207      | 547 ± 292       |
| Dihydro-resveratrol                  | ND                              | ND           | 54 ± 7         | 61 ± 13         |
| Quercetin glucuronide                | ND                              | 431 ± 126    | 17 ± 3         | 147 ± 22        |
| Quercetin sulfate                    | ND                              | 213 ± 38     | ND             | 131 ± 17        |
| Quercetin glucuronide sulfate        | ND                              | 318 ± 103    | 19 ± 3         | 214 ± 44        |
| Cyanidin 3-glucoside                 | ND                              | 51 ± 12      | ND             | 14 ± 2          |
| Malvidin 3-arabinoside               | ND                              | 302 ± 83     | ND             | 227 ± 44        |
| Delphinidin 3-glucoside              | ND                              | 87 ± 25      | ND             | 14 ± 1          |
| Petunidin 3-glucoside                | ND                              | 157 ± 45     | ND             | 50 ± 13         |
| Malvidin 3-glucoside                 | ND                              | 202 ± 51     | ND             | 171 ± 36        |
| 3,4-dihydroxyphenyl propionic acid   | 1046 ± 607                      | 1651 ± 614   | 10065 ± 3439   | 6567 ± 1982     |
| 3,4-dihydroxyphenyl acetic acid      | 3279 ± 867                      | 20398 ± 3419 | 4457 ± 1324    | 9834 ± 2913     |
| Chlorogenic acid                     | ND                              | 38111 ± 6181 | ND             | 8505 ± 663      |
| Protocatechuic acid                  | 10025 ± 969                     | 34994 ± 5278 | 4858 ± 288     | 10652 ± 1349    |
| Total (nmol/g)                       | 14 ± 2                          | 105 ± 17     | 784 ± 59       | 581 ± 90        |

Data are expressed as mean of replicates ± SEM (control group: n=6 mice, treated groups: n=10).

ND: Not detected
